# Progesterone Receptor Regulates Bcl-2 Gene Expression through Direct Binding to Its Promoter Region in Uterine Leiomyoma Cells

Ping Yin, Zhihong Lin, You-Hong Cheng, Erica E. Marsh, Hiroki Utsunomiya, Hiroshi Ishikawa, Qing Xue, Scott Reierstad, Joy Innes, Stephen Thung, J. Julie Kim, Eugene Xu, and Serdar E. Bulun

Division of Reproductive Biology Research (P.Y., Z.L., Y.-H.C., E.E.M., H.U., H.I., Q.X., S.R., J.I., J.J.K., E.X., S.E.B.), Department of Obstetrics and Gynecology, Feinberg School of Medicine at Northwestern University, Chicago, Illinois 60611; and Department of Obstetrics, Gynecology, and Reproductive Sciences (S.T.), Yale University School of Medicine, New Haven, Connecticut 06520

**Context:** Uterine leiomyomas are smooth muscle cell tumors that cause irregular uterine bleeding and pregnancy loss in many reproductive-age women. Progesterone stimulates their growth, whereas treatment with progesterone receptor (PR) antagonists or selective progesterone receptor modulators shrinks these tumors. Molecular mechanisms underlying these observations are unknown.

**Objective:** Bcl-2 is a key protein that inhibits apoptosis. It was proposed that growth enhancement of leiomyoma cells by progesterone was mediated via bcl-2 induction. Here we test the hypothesis that PR regulates the bcl-2 gene by directly binding to its promoter.

**Results:** The pure progesterone agonist R5020 increased the total number of viable primary human leiomyoma smooth muscle (LSM) cells in culture. Progesterone or R5020 ( $10^{-6}$  M) significantly increased bcl-2 mRNA levels after 2 and 4 h by 9.2- and 3.4-fold, re-

spectively, in LSM cells. Transient transfection with deletion mutants of bcl-2 promoter showed that the –1281/–258-bp region conferred responsiveness to progesterone induction in the presence of PR-A. We identified a palindromic progesterone response element (PRE) at –553/–539 bp. EMSA showed that PR in nuclear extracts from LSM cells bound specifically to this PRE. Chromatin immunoprecipitation-PCR confirmed *in situ* recruitment of PR to the –629/–388-bp region bearing the PRE. *In vivo*, bcl-2 mRNA levels correlated significantly with total PR mRNA levels in leiomyoma tissues.

**Conclusion:** Taken together, progesterone via PR interacts with the bcl-2 promoter to induce its expression in leiomyoma tissue. This may explain, in part, the progesterone-dependent enhancement of growth in uterine leiomyoma. (*J Clin Endocrinol Metab* 92: 4459–4466, 2007)

UTERINE LEIOMYOMAS ARE the most common gynecological tumors in women of reproductive age. Growing evidence from biochemical, histological, clinical, and pharmacological studies indicates that progesterone and progesterone receptor (PR) play key roles in uterine leiomyoma growth and development (1). Several investigators have shown an increased concentration of both PR isoforms (PR-A and PR-B) in leiomyoma tissue, compared with adjacent myometrium (2, 3). Furthermore, increases in mitotic activity occur in leiomyoma tissue relative to the adjacent myometrial tissue during the luteal phase and after treatment with medroxyprogesterone acetate (4, 5). Additionally, *in vitro* studies showed that progesterone suppresses apoptosis and stimulates proliferation of leiomyoma smooth muscle (LSM) cells in culture, whereas PR modulators inhibit proliferation and induce apoptosis in these cells (6–11).

Clinical studies with both progestins and mifepristone also

indicate that progesterone may be a key hormone that regulates leiomyoma growth. The synthetic progestins, medroxyprogesterone acetate and norethindrone, when used as add-back therapy in combination with GnRH agonists, attenuate or reverse the inhibitory effects of GnRH agonists on leiomyoma size, whereas mifepristone and asoprisnil were shown to reduce leiomyoma volume (12–14). All these findings suggested that progesterone plays an important role in leiomyoma growth; however, we know little about the underlying mechanisms.

The Bcl-2 protooncogene was discovered in lymphomas composed of B cells (15). The product of the bcl-2 gene, when elevated in cells either *in vivo* or *in vitro*, prevents the normal course of apoptotic cell death in a variety of cells induced by tropic factor deprivation or other stimuli without altering proliferation (16). In addition to extending the life span of certain cells, bcl-2 can promote cell replication by reducing the requirements for growth factors (17). It seems therefore that bcl-2 protein may play an important role in the growth of tumors.

Previous studies on steroid hormone responsive tissues, such as breast and endometrium, suggested that bcl-2 mRNA and protein levels might be regulated by progesterone or synthetic progestins in these tissues (18–20). In leiomyoma relative to the adjacent myometrium, bcl-2 expression was increased, and its expression was most abundant during the

First Published Online September 4, 2007

Abbreviations: cFBS, Charcoal-stripped fetal bovine serum; ChIP, chromatin immunoprecipitation; GAPDH, glyceraldehyde-3-phosphate dehydrogenase; GFP, green fluorescent protein; LSM, leiomyoma smooth muscle; MTT, 3-(4,5-dimethylthiazolyl-2)-2,5-diphenyltetrazolium bromide; PR, progesterone receptor; PRE, progesterone response element.

JCEM is published monthly by The Endocrine Society (<http://www.endo-society.org>), the foremost professional society serving the endocrine community.

secretory phase of the menstrual cycle (2, 6). In cultured LSM cells, progesterone also markedly increased bcl-2 protein levels, whereas selective PR modulators significantly suppressed them (6, 9), suggesting that up-regulation of bcl-2 protein by progesterone may be important for the growth of leiomyoma. However, no information is currently available on the mechanism by which progesterone regulates bcl-2 expression.

Here we demonstrate the transcriptional mechanism responsible for progesterone and PR-dependent induction of bcl-2 in LSM cells using primary culture as a model system. We describe the binding of PR to a specific region on the bcl-2 promoter that confers responsiveness to progesterone.

## Materials and Methods

### Tissue collection and cell culture

Human uterine leiomyoma and matched myometrium were collected from 21 premenopausal women (mean age 40 yr, range 27–50) undergoing hysterectomy. The size of the tumors ranged from 3.5 to 12 cm in diameter. The subjects had not received any hormonal treatment during the 6 months before surgery. The tissues were collected from the Prentice Women's Hospital at Northwestern University with the approval of its institutional review board. Each uterine specimen was evaluated histologically by a pathologist. Nine samples were obtained during the luteal phase, seven during the follicular phase, and five during menstruation. We isolated LSM cells from the peripheral portions (~1 cm to the capsule) of the leiomyoma and cultured them as previously described (21). Cells used in the experiments were passaged two or three times.

### Cell viability assay

The effects of the progesterone agonist R5020 on the viability of LSM cells were evaluated by the 3-(4,5-dimethylthiazolyl-2)-2,5-diphenyltetrazolium bromide (MTT) assay (American Type Culture Collection, Manassas, VA), as previously described (9). The cells were cultured to 70% confluence and starved in serum-free medium for 24 h. Then cells were treated in the presence or absence of various concentrations of R5020 ( $10^{-8}$ ,  $10^{-7}$ ,  $10^{-6}$  M) in phenol red-free DMEM/F12 with 2% charcoal-stripped fetal bovine serum (cFBS) for 96 h and the MTT assay was done.

### RNA preparation and real-time quantitative PCR

Total RNA from LSM cells and tissues of leiomyoma and matched myometrium was extracted using Tri-reagent (Sigma-Aldrich, St. Louis, MO). cDNAs were made from 2  $\mu$ g total RNA with the Superscript III first-strand synthesis system (Invitrogen, Carlsbad, CA). Bcl-2, PR and glyceraldehyde-3-phosphate dehydrogenase (GAPDH) mRNA were amplified by real-time PCR using the ABI TaqMan gene expression system (Applied Biosystems, Foster City, CA) and the ABI 7900 sequence detection system. All gene expression was normalized to GAPDH. Data reported are the mean fold change  $\pm$  SD for triplicate measurements.

### Immunoblotting

Cell lysates were prepared in modified radioimmunoprecipitation assay buffer and analyzed by immunoblotting as described previously (22) using mouse monoclonal anti-PR (kindly provided by Dr. Dean Edwards, Baylor College of Medicine, Houston, TX), monoclonal anti-bcl-2 (Santa Cruz Biotechnology, Santa Cruz, CA), and monoclonal anti- $\beta$ -actin (Sigma-Aldrich) antibodies.

### Transient transfections and luciferase assays

Progressive deletion mutants of the bcl-2 promoter fused to the luciferase reporter gene in pGL3 plasmids were constructed as previously described (23, 24). The -1281/-1- and -258/-1-bp promoter fragments in the pGL3 plasmids were sequenced for fidelity. Transient

transfection of LSM cells was carried out with the Fugene HD reagent (Roche Applied Science, Indianapolis, IN) with the following plasmids: 1) 1  $\mu$ g of pGL3-basic luciferase reporter plasmid containing -1281/-1 bp or -258/-1 bp fragments of bcl-2 promoter region; 2) 300 ng of pCMV- $\beta$ -gal plasmid as an internal control (Promega, Madison, WI); 3) 1  $\mu$ g of pSG5 expression vector containing a full-length human PR-A or PR-B cDNA [PR-A and PR-B vectors were graciously provided by Dr. Pierre Chambon (25)]; and 4) 1  $\mu$ g of the established progesterone-responsive reporter plasmid pPRE/GRE.E1b.Luc (kindly provided by Dr. Ming-Jer Tsai, Baylor College of Medicine, Houston, TX) as a positive control (26). After transfection for 5 h, the cells were incubated in phenol red-free DMEM/F12 with 10% cFBS overnight. Then the cells were starved for 5 h and treated for 40 h with  $10^{-6}$  M R5020 in 5% cFBS. Luciferase assays were performed using luciferase reporter assay kit (Promega). Luciferase activity was normalized to  $\beta$ -gal values. PR-A and PR-B were selectively overexpressed to enhance progestogenic effect and also to assess their individual roles. To examine the transfection efficiency in primarily cultured LSM cells, cells were transfected with pmaxGFP (Amara Biosystems, Gaithersburg, MD) and counted for green fluorescent protein (GFP)-positive cells by flow cytometry.

### Chromatin immunoprecipitation (ChIP) assays

LSM cells (untransfected) were incubated with  $10^{-6}$  M progesterone or vehicle (ethanol) for 1 h. ChIP assays were performed as described previously using a kit from Upstate Biotechnology (Lake Placid, NY) (22). The sonicated chromatin fraction was immunoprecipitated with an equal amount of either rabbit IgG or anti-PR antibody (Abcam, Cambridge, MA), which recognizes both PR-A and PR-B. Chromosomal DNA was purified and analyzed by PCR for the presence of the bcl-2 promoter (-629/-388 bp). The primer sequences used for PCR were: forward: 5'-CTGGAGAGTCTGAA-GATTG-3'; reverse: 5'-CACACTACAAGTAACACGGC-3'.

### EMSA

LSM cells (untransfected) were treated for 2 h with  $10^{-6}$  M progesterone. Nuclear protein was extracted from whole cells using NE-PER nuclear and cytoplasmic extraction reagents (Pierce, Rockford, IL). EMSA was performed using a LightShift chemiluminescent EMSA kit (Pierce). The sequence of the double-stranded oligonucleotide used for EMSA was 5'-GACAGAGGATCATGCTGTACTTAAA-3', which is identical with a 25-bp-long sequence (-559/-535 bp) within the promoter region of the bcl-2 gene and contains an imperfect 15-bp palindromic progesterone response element (PRE; -553/-539). The mutant probe is an unlabeled 25-bp oligonucleotide, in which 3 bp of the 15-bp PRE at -549, -543, and -540 positions were replaced by As.

Biotin end-labeled oligonucleotide probes were purchased from Sigma-Aldrich and annealed to the complementary oligonucleotides. Twenty femtomoles of labeled probe and 3  $\mu$ g of nuclear extract were incubated for 20 min at room temperature in a reaction mix containing 5% (vol/vol) glycerol, 10 mM Tris-HCl, 50 mM NaCl, 1 mM MgCl<sub>2</sub>, 0.5 mM dithiothreitol, and 2  $\mu$ g of poly(dI-dC). For DNA competition EMSA, the unlabeled wild-type or mutant probe (4 pmol) was added simultaneously with the labeled probe. For supershift experiments, 5  $\mu$ g of PR antibody were added, and incubation was continued for an additional 40 min on ice. Nondenaturing polyacrylamide gels (5%) were used to resolve protein-DNA complexes. Protein-DNA samples were transferred to the Biotinylated B precut modified nylon membrane (Pierce). Protein-DNA complexes were detected using a LightShift chemiluminescent EMSA kit (Pierce) and exposed to the CL-XPosure film (Pierce).

### Statistical analysis

Differences among groups were analyzed by one-way ANOVA followed by Fisher's protected least-significant difference test, using Statview (Abacus Concepts, Inc., Berkeley, CA). Significance was accepted at  $P < 0.05$ .

## Results

### Effects of the progesterone agonist R5020 on leiomyoma cell growth

The PR levels in cultured LSM cells were examined by immunoblotting using whole-cell lysates from leiomyoma tissue, LSM cells at various passages (P0, P1, P2, or P3). Consistent with previously published data, cultured cells contained lower levels of PR, compared with leiomyoma tissue (Fig. 1A, please note that the exposure time for tissue is 10 sec, but it takes about 1 min to detect the bands in cultured cells) (27). It has previously been shown that LSM cells cultured in serum-free media become quiescent and are then fully stimulated to reenter the cell cycle after incubation with 10% fetal bovine serum or show half-maximal stimulation to reenter the cell cycle when incubated with 2% fetal bovine serum (21, 28). Using LSM cells grown in charcoal-stripped serum and phenol red-free media and subsequently made quiescent under serum-free conditions, we evaluated the effects of treatment with various concentrations of R5020 on cell viability using the MTT assay. Exposure of LSM cells to R5020 increased the number of viable cells in a dose-dependent manner (Fig. 1B). The number of viable cells increased by 1.4-fold when treated with  $10^{-6}$  M R5020, which was significantly higher than untreated control cells ( $P =$

0.008). These data suggest that the progesterone agonist R5020 promotes LSM cell growth.

### Regulation of *bcl-2* mRNA and protein levels in leiomyoma cells

We investigated the effects of progesterone and its synthetic agonist R5020 on the expression of genes that regulate apoptosis and proliferation, namely *bcl-2*, *bcl-x*, and *c-myc*, in cultured LSM cells. Progesterone ( $10^{-6}$  M) increased *bcl-2* mRNA by 9.3-fold at 2 h ( $P = 0.009$ ) (Fig. 2A). Treatment with R5020 ( $10^{-6}$  M) resulted in a 1.6-fold induction of *bcl-2* mRNA at 2 h, which increased to 3.4-fold induction at 4 h ( $P = 0.04$ ), followed by a decline toward control levels at 8 h (Fig. 2A). Both progesterone and R5020 resulted in significant but modest inductions of *c-myc* mRNA levels at 1 h but not at 2, 4, or 8 h (Fig. 2B). *Bcl-x* mRNA levels were not affected by progestins at any of the time points (Fig. 2C). Treatment with R5020 ( $10^{-6}$  M) for 72 h increased *bcl-2* protein levels (Fig. 2D). These results demonstrate that progesterone or its agonist R5020 has a limited regulatory effect on *bcl-x* and *c-myc* expression in LSM cells, but it significantly enhances *bcl-2* expression, suggesting that progesterone supports cell survival through up-regulation of the antiapoptotic gene *bcl-2* in these cells.

### Regulation of *bcl-2* promoter activity by PR and R5020

The transfection efficiency was examined by transfecting cells with pmaxGFP for 48 h and counting GFP-positive cells by flow cytometry; the positive rate is approximately 20% (Fig. 3A). Luciferase reporter constructs containing  $-1281/-1$  or  $-258/-1$  bp (relative to the translation start site) of the 5'-flanking region of the human *bcl-2* promoter were transfected into LMS cells along with a human PR expression vector expressing one of the isoforms of PR: PR-A or PR-B. The pGL3-basic and pSG5 plasmids were transfected as controls. After transfection and incubation in the presence or absence of  $10^{-6}$  M R5020 for 40 h, the cells were collected and assayed for luciferase activity. In the absence of PR expression vectors, R5020 had a modest stimulatory effect on the  $-1281$ -bp but not the  $-258$ -bp luciferase construct (Fig. 3B). Cotransfection of the PR-A expression vector in the presence of R5020 significantly induced the  $-1281$ -bp promoter, demonstrating that progestin-responsive regulatory region exists between  $-1281$  and  $-258$  bp of the *bcl-2* promoter. Unliganded PR-A also up-regulated the  $-1281$  promoter, although not to the magnitude of liganded PR-A. Interestingly, the  $-1281$  promoter did not respond to PR-B. The  $-258$  promoter did not respond to progestins for either PR-A or PR-B. These data show a specificity of the *bcl-2* promoter to PR-A. To demonstrate that the PR-B expression vector encodes functional PR-B, the cells were cotransfected with an established progesterone responsive plasmid pPRE/GRE.E1b.Luc and treated with R5020 for 40 h. As shown in Fig. 3C, PR-B in the presence of R5020 significantly stimulated pPRE/GRE.E1b.Luc, but PR-A had a significantly weaker effect.

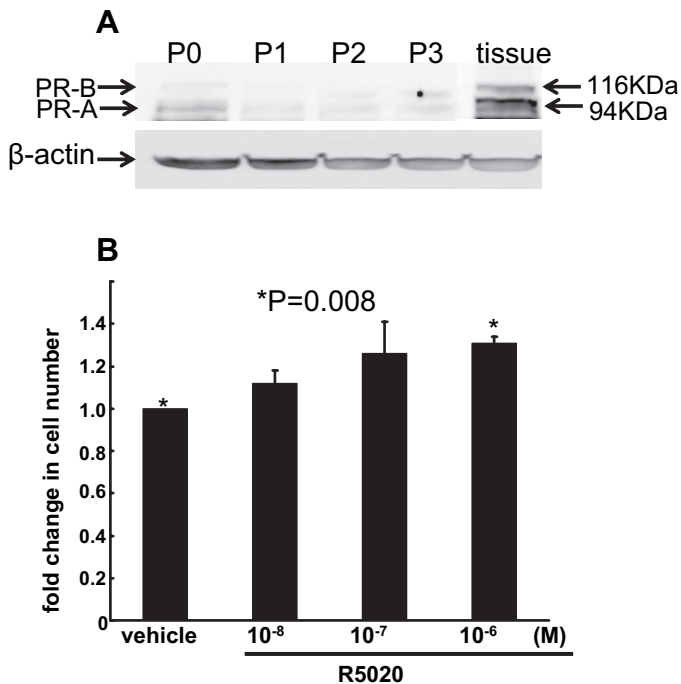

FIG. 1. A, Comparison of PR protein levels in tissue and cultured LSM cells. Cells were passaged and cultured to 80% confluency. Cell lysates were prepared for immunoblotting with anti-PR and  $\beta$ -actin (loading control) antibodies. B, Effects of various concentrations of R5020 on the number of viable cultured human LSM cells in the presence of 2% cFBS, as assessed by MTT assay. Compared with the ethanol (vehicle)-treated control, treatment with  $10^{-6}$  M R5020 for 96 h significantly increased the number of viable LSM cells. The data are expressed as mean  $\pm$  SEM fold change from the control value in triplicate experiments repeated three times on primary LSM cells isolated from three subjects. P0, Passage 0; P1, passage 1; P2, passage 2; P3, passage 3.

FIG. 2. Time-dependent induction of mRNA and protein levels of bcl-2, mRNA levels of *c-myc*, and bcl-x by progesterone or R5020 in primary LSM cells. LSM cells were treated with progesterone ( $10^{-6}$  M), R5020 ( $10^{-6}$  M) or ethanol (vehicle) as control, for 1, 2, 4, and 8 h. Total RNA was extracted and analyzed for the expression of bcl-2 (A), *c-myc* (B), and bcl-xl (C) via real-time quantitative RT-PCR. D, LSM cells were treated with R5020 ( $10^{-6}$  M) or ethanol (vehicle) as control for 72 h. Cell lysates were prepared for immunoblotting with anti-bcl-2 and  $\beta$ -actin (loading control) antibodies. The data are expressed as fold increase, compared with vehicle-treated cells and represent mean  $\pm$  SD of triplicate experiments.

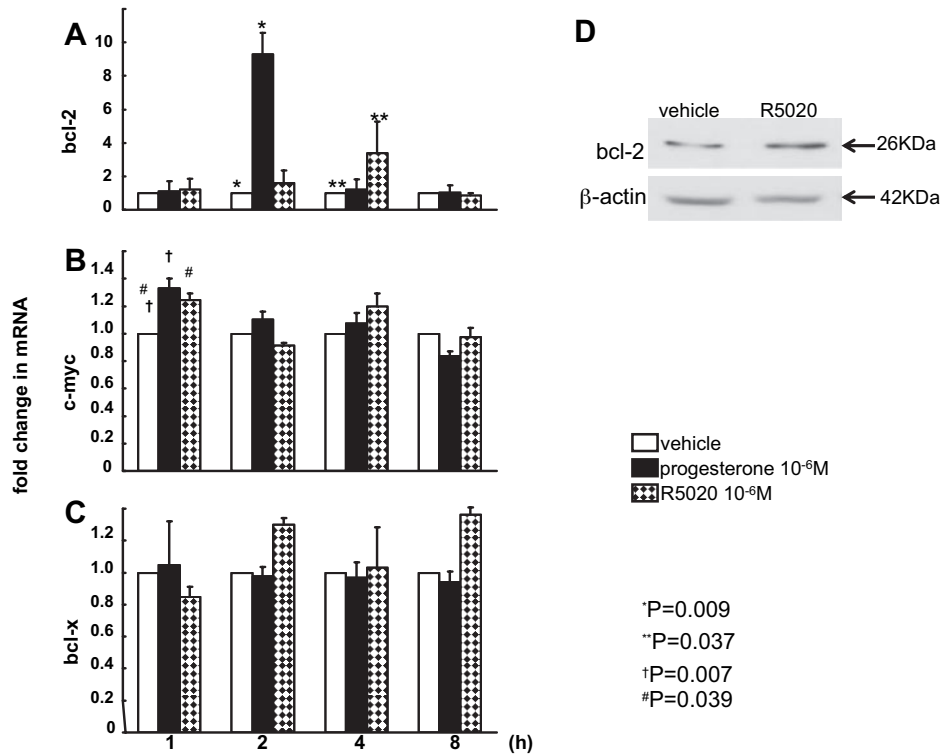

#### Binding of PR to a PRE in the bcl-2 promoter

Because progesterone or R5020 regulated bcl-2 gene expression and promoter activity, we looked for a PRE in the promoter region. Using the transcription element search system (<http://www.cbil.upenn.edu/tess/>), a 15-bp PRE-like sequence GGATCATgcTGACT at  $-553/-539$  from the ATG start site was identified in the bcl-2 promoter, which is 93% homologous to the consensus PRE sequence described by Lieberman *et al.* (29).

To elucidate whether nuclear proteins bind specifically to this regulatory region, an EMSA was performed using nuclear extracts from LSM cells and a 25-bp probe identical with the sequence that flanked the PRE. These cells had been incubated with progesterone for 2 h before harvesting to ensure PR was occupied by ligand. Figure 4 shows that a specific DNA-protein complex was formed when a biotin-labeled oligonucleotide probe was incubated with the nuclear extract (lane 2). Addition of a 200-fold excess of unlabeled wild-type oligonucleotide decreased binding of extracts to the labeled oligonucleotide demonstrating specificity. In addition, competition with an unlabeled and mutated oligonucleotide in which three bases within the putative PRE were mutated did not disrupt the protein-DNA binding. Lane 5 shows that inclusion of anti-PR antibody resulted in total immunodepletion of the protein-DNA complex, whereas normal IgG had no effect (lane 6). These data suggest that PR binds to the PRE in the bcl-2 gene promoter in a specific manner.

ChIP assays were performed to confirm that the bcl-2 promoter region containing the PRE was occupied by endogenous PR *in situ*. Sheared chromatin isolated from cultured LSM cells, treated with progesterone or vehicle for 1 h, was immunoprecipitated with anti-PR antibody. The pres-

ence of bcl-2 promoter DNA in the immunoprecipitate was determined by PCR amplification. As shown in Fig. 5B, bcl-2 DNA was specifically immunoprecipitated with the anti-PR antibody but not with a nonspecific IgG. Treatment with progesterone significantly enhanced binding of PR to this site. These results demonstrate that endogenous PR binds *in situ* to the bcl-2 promoter region.

The findings from ChIP, EMSA, and reporter gene assays strongly support the notion that progesterone and PR highly regulate the promoter activity of the bcl-2 gene through a PRE located at  $-553$  to  $-539$ . In addition, PR-A appeared to play a predominant role in this regulation.

#### An *in vivo* correlation between bcl-2 and PR mRNA in leiomyoma tissue

To determine whether there is an *in vivo* interaction between bcl-2 and PR expression in leiomyoma tissue, we analyzed mRNA levels of bcl-2 and PR in human leiomyoma and matched adjacent myometrial tissues from 18 subjects using real-time PCR. To allow comparisons of data obtained from samples of different subjects, the mRNA levels of bcl-2 and PR were normalized to GAPDH, and then the mRNA level in leiomyoma tissue was expressed as a multiple of that in the matched myometrium, allowing the detection of relative mRNA differences between the two tissues. Among the specimens from 18 subjects, eight leiomyoma samples had distinctly higher levels of bcl-2 than those in myometrial tissues, five leiomyoma samples showed lower bcl-2 mRNA levels, and bcl-2 levels in leiomyoma and myometrial tissues were similar in five subjects. The mean mRNA level of bcl-2 in leiomyoma samples was approximately 1.4-fold higher than that in myometrial samples. This observed trend did not reach statistical significance ( $P = 0.12$ ). Importantly, subjects

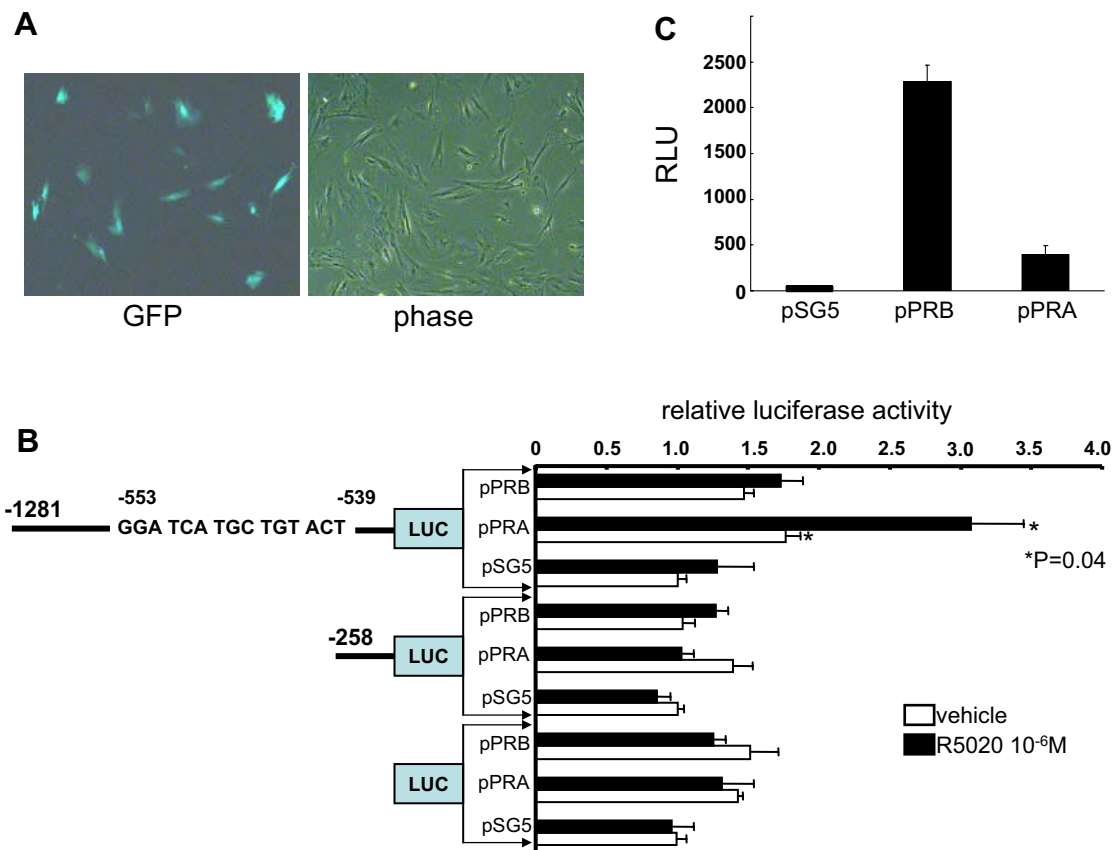

FIG. 3. Transcriptional activation of *bcl-2* promoter reporter constructs by R5020. A, Photomicrographs showing representative images of GFP-positive cells. B, LSM cells were transiently transfected with luciferase fusion vectors containing  $-1281$ - or  $-258$ -bp of 5'-flanking region relative to the *bcl-2* translation start site. The cells were also transiently cotransfected with expression vectors encoding either PR-A or PR-B. The cells were treated with ethanol as control or  $10^{-6}$  M R5020 for 40 h. Luciferase activity of each construct was normalized to  $\beta$ -gal and then to that of the cells cotransfected with pGL3-basic and pSG5 empty vector incubated in the absence of R5020, which was set to 1. C, LSM cells were cotransfected with an established progesterone responsive reporter plasmid pPRE/GRE.E1b.Luc and with expression vectors PR-A and PR-B, and then the cells were treated and extracted for luciferase assay as in B. The experiments were done independently three times. Error bars show SD values among triplicates from a single representative transfection. pSG5, Empty control vector for PR-A and PR-B.

with higher levels of *bcl-2* mRNA in leiomyoma also had comparably higher levels of PR mRNA, and vice versa. Regression analysis indicated a highly significant correlation between *bcl-2* mRNA level and PR mRNA level ( $R = 0.82033$ ,  $P = 0.000031$ ) in leiomyoma tissue (Fig. 6). This suggested that expression of *bcl-2* is strongly and positively associated with the PR status *in vivo* in leiomyoma tissue.

Interestingly, mean *bcl-2* and PR mRNA levels were higher in luteal *vs.* follicular phase leiomyoma samples, whereas opposite trends were observed in matched myometrial samples. None of these trends, however, reached statistical significance.

### Discussion

Bcl-2 is an important protein involved in the control of apoptosis. To our knowledge, the present study is the first to report a progesterone regulatory region in the promoter of this gene. Previous studies have shown that progesterone down-regulated *bcl-2* levels in endometrium and breast cancer cells (18, 19). Microarray analysis of mouse uterine tissue showed that *bcl-2* mRNA levels decreased after progesterone treatment (20). Progesterone and its agonist R5020 treatment

stimulated *bcl-2* mRNA and promoter activity via PR in primary LSM cells, which is consistent with a previously published study of Matsu *et al.* (6). However, Matsu *et al.* reported that *bcl-2* protein was uniformly increased in leiomyoma tissues and cells relative to normal myometrium, which is different from our data showing that leiomyoma (*vs.* myometrial) *bcl-2* mRNA levels are higher in some subjects but not in others, suggesting that some posttranslational regulation may control *bcl-2* protein levels. The contrasting effects of progesterone on *bcl-2* expression in leiomyoma *vs.* endometrium is intriguing but somewhat predictable and is consistent with the opposite functions of progesterone in endometrium and myometrium. For example, progesterone prevents estrogen-dependent growth of endometrial tissue, whereas progesterone enhances growth in uterine leiomyoma and breast tissue (30, 31). The mechanism underlying the contrasting effects of progesterone on *bcl-2* expression in endometrium and leiomyoma is unclear. One possibility is that in endometrium, progesterone functions indirectly through antagonizing the effect of estradiol on *bcl-2* regulation (19), whereas in leiomyoma, as we found in this study, it up-regulates *bcl-2* gene expression.

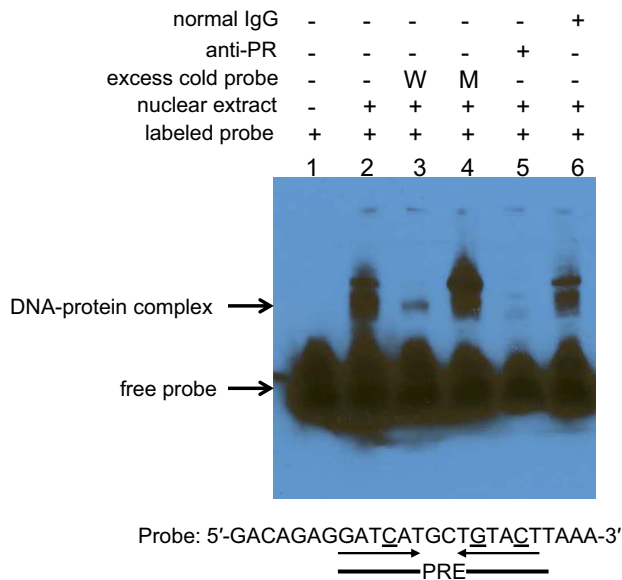

FIG. 4. EMSA analysis of PR binding region of *bcl-2* promoter. EMSAs were performed using samples of nuclear extracts (3  $\mu$ g) from LSM cells treated with progesterone for 2 h and biotin-labeled oligonucleotide probes containing putative PR binding sites and its flanking sequence. Competition studies were performed using 200-fold excess of cold unlabeled wild-type (W; lane 3) or mutant (M; lane 4) probes. Immunodepletion of complexes was performed using 5  $\mu$ g of anti-PR (lane 5) antibody. Normal IgG was added as a negative control (lane 6). The indirect repeats in the palindromic PRE in the probe are indicated by *arrows*. The bases changed to As in the mutated probe are *underlined*. The figure represents one of the three independently performed experiments.

Here we demonstrated that R5020 increased total viable primary LSM cells. Others have also reported that progestins stimulate proliferation and inhibit apoptosis of primary LSM cells, whereas the selective PR modulator asoprisnil inhibits proliferation and induces apoptosis in the same cells (5–11). Our report further explored the molecular mechanisms by which progestin stimulation of leiomyoma growth occurs. Our working hypothesis is that progestin-dependent growth

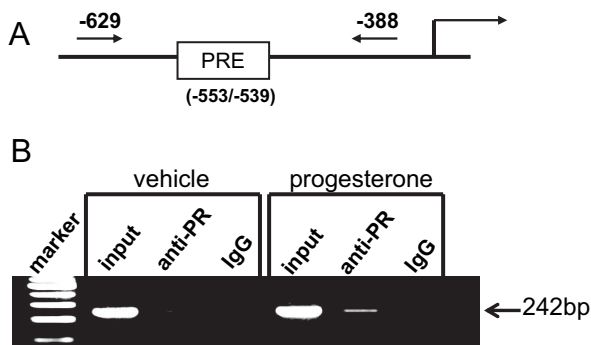

FIG. 5. *In vivo* binding of human PR to the *bcl-2* promoter in LSM cells. Chromatin prepared from LSM cells treated for 1 h with  $10^{-6}$  M progesterone or vehicle (ethanol) was subjected to the ChIP procedure using an anti-PR antibody or a nonspecific anti-rabbit IgG. The isolated DNA fragments were amplified by 40 cycles of PCR using primers covering -629/-388 (relative to *bcl-2* translation start site) of 5'-flanking region of *bcl-2*. Input, Nonprecipitated chromatin; anti-PR, chromatin precipitated with a specific antibody against PR; IgG, chromatin precipitated with nonspecific rabbit IgG.

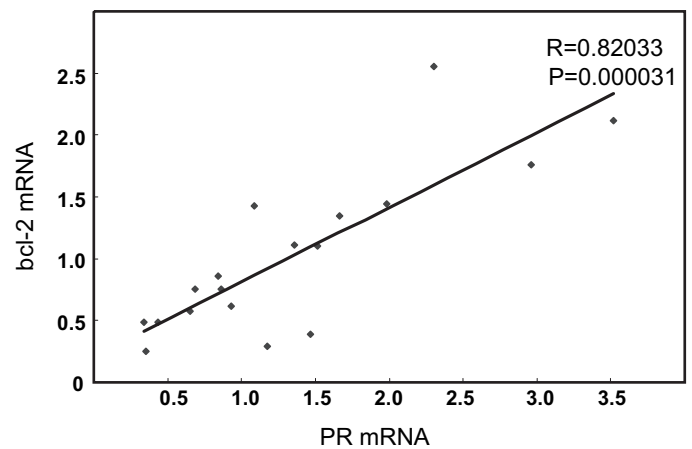

FIG. 6. Correlation between mRNA levels of *bcl-2* and PR in human leiomyoma and myometrial tissues. Overall, 36 samples from 18 subjects were analyzed; 18 samples were obtained from leiomyomas and 18 from adjacent myometrial tissues. To allow comparisons of data obtained from samples from different subjects, mRNA levels in the myometrial tissues were normalized to 1. Regression analysis indicated *bcl-2* mRNA levels correlated significantly and positively with PR mRNA levels ( $R = 0.82033$ ,  $P = 0.000031$ ).

stimulation involves enhancement of *bcl-2* expression, predicting a progesterone-PR-mediated regulatory region upstream of the *bcl-2* promoter. The above data are consistent with this hypothesis.

Transfection of either PR-A or PR-B expression vector together with the *bcl-2* promoter region to the LSM cells provided an opportunity to study selective effects of each PR isoform. Progestin-dependent stimulation of *bcl-2* promoter activity could clearly be demonstrated in the presence of PR-A but not with the full-length isoform PR-B. This is consistent with previously published work on distinct biological roles of PR-A and PR-B in various tissues (32). For example, selective knockout of PR-A *vs.* PR-B in mice demonstrated an important role of PR-A in uterine physiology, whereas PR-B knockout mice did not exhibit a uterine phenotype (33, 34). Thus, it is conceivable that PR-A, but not PR-B, selectively mediates progesterone action on the *bcl-2* gene in LSM cells in culture.

PR binds to the palindromic consensus sequence located in the promoter or enhancer regions of target genes (29, 35). After analysis of proximal promoter region of *bcl-2* gene, we identified a 15-bp PRE at -553/-539 relative to the ATG start site, which contains two palindromic repeats and closely resembles the consensus sequence described by Beato (36) and Lieberman *et al.* (29). Although the identified sequence does not perfectly match the consensus sequence (93% homology), it contains the most important nucleotides for receptor binding, including the four major guanine/cytosine contact points (37, 38). Additionally, the PRE found in the *bcl-2* gene does not have complete dyad symmetry with respect to the two 6-bp elements, which is consistent with studies indicating that steroid hormone receptors are not binding to the two half-sites in an equivalent manner (39). EMSAs using wild-type and mutant competitor DNA fragments and anti-PR antibody clearly demonstrated that the 15-bp PRE binds to the nuclear proteins present in proges-

terone-stimulated LSM cells in a specific manner. *In situ* recruitment of PR to the promoter region bearing this PRE was further confirmed by ChIP. Thus, our results are suggestive that binding of ligand-activated PR to this PRE is important for regulation of bcl-2 by progesterone. It was also shown that PR interacts rapidly with SH3 domains of various cytoplasmic signaling molecules, including c-Src tyrosine kinases (40). A potential role of this nongenomic mechanism should be explored regarding progesterone action in leiomyoma.

In summary, we demonstrated that the PRE-like sequence in the human bcl-2 promoter region specifically binds PR and confers progesterone responsiveness to the human bcl-2 gene, thus providing one explanation of the ability of progesterone to regulate bcl-2 expression in leiomyoma cells. We plan to analyze this PRE-like sequence further using site-directed mutagenesis, investigate the interaction of PR with other transcription factors and *cis*-acting regulatory elements, and evaluate whether this sequence also responds to other members of the PR subfamily of nuclear receptors, *i.e.* glucocorticoid, androgen, and mineralcorticoid receptors.

### Acknowledgments

We thank Dr. Pierre Chambon for the PR-A and PR-B expression plasmids; Dr. Dean Edwards for the PR antibody; and Dr. Ming-Jer Tsai for pPRE/GRE.E1b.Luc construct.

Received March 28, 2007. Accepted August 24, 2007.

Address all correspondence and requests for reprints to: Serdar E. Bulun, M.D., Division of Reproductive Biology Research, Department of Obstetrics and Gynecology, Northwestern University, 303 East Superior Street, Suite 4-123, Chicago, Illinois 60611. E-mail: s-bulun@northwestern.edu.

This work was supported by National Institutes of Health Grant HD46260.

Disclosure Statement: P.Y., Z.L., Y.-H.C., E.E.M., H.U., H.I., Q.X., S.R., J.L., S.T., J.J.K., and E.X. have nothing to declare. S.E.B. consults for GSK and Novartis.

### References

- Chwalisz K, Perez MC, Demanno D, Winkel C, Schubert G, Elger W 2005 Selective progesterone receptor modulator development and use in the treatment of leiomyomata and endometriosis. *Endocr Rev* 26:423–438
- Kovacs KA, Lengyel F, Kornyei JL, Vertes Z, Szabo I, Sumegi B, Vertes M 2003 Differential expression of Akt/protein kinase B, Bcl-2 and Bax proteins in human leiomyoma and myometrium. *J Steroid Biochem Mol Biol* 87:233–240
- Brandon DD, Bethea CL, Strawn EY, Novy MJ, Burry KA, Harrington MS, Erickson TE, Warner C, Keenan EJ, Clinton GM 1993 Progesterone receptor messenger ribonucleic acid and protein are overexpressed in human uterine leiomyomas. *Am J Obstet Gynecol* 169:78–85
- Kawaguchi K, Fujii S, Konishi I, Nanbu Y, Nonogaki H, Mori T 1989 Mitotic activity in uterine leiomyomas during the menstrual cycle. *Am J Obstet Gynecol* 160:637–641
- Tiltman AJ 1985 The effect of progestins on the mitotic activity of uterine fibromyomas. *Int J Gynecol Pathol* 4:89–96
- Matsuo H, Maruo T, Samoto T 1997 Increased expression of Bcl-2 protein in human uterine leiomyoma and its up-regulation by progesterone. *J Clin Endocrinol Metab* 82:293–299
- Maruo T, Matsuo H, Shimomura Y, Kurachi O, Gao Z, Nakago S, Yamada T, Chen W, Wang J 2003 Effects of progesterone on growth factor expression in human uterine leiomyoma. *Steroids* 68:817–824
- Chegini N, Ma C, Tang XM, Williams RS 2002 Effects of GnRH analogues, ‘add-back’ steroid therapy, antiestrogen and antiprogestins on leiomyoma and myometrial smooth muscle cell growth and transforming growth factor-beta expression. *Mol Hum Reprod* 8:1071–1078
- Xu Q, Takekida S, Ohara N, Chen W, Sitruk-Ware R, Johansson ED, Maruo T 2005 Progesterone receptor modulator CDB-2914 down-regulates proliferative cell nuclear antigen and Bcl-2 protein expression and up-regulates caspase-3 and poly(adenosine 5'-diphosphate-ribose) polymerase expression in cultured human uterine leiomyoma cells. *J Clin Endocrinol Metab* 90:953–961
- Chen W, Ohara N, Wang J, Xu Q, Liu J, Morikawa A, Sasaki H, Yoshida S, Demanno DA, Chwalisz K, Maruo T 2006 A novel selective progesterone receptor modulator asoprisnil (J867) inhibits proliferation and induces apoptosis in cultured human uterine leiomyoma cells in the absence of comparable effects on myometrial cells. *J Clin Endocrinol Metab* 91:1296–1304
- Sasaki H, Ohara N, Xu Q, Wang J, DeManno DA, Chwalisz K, Yoshida S, Maruo T 2007 A novel selective progesterone receptor modulator asoprisnil activates tumor necrosis factor-related apoptosis-inducing ligand (TRAIL)-mediated signaling pathway in cultured human uterine leiomyoma cells in the absence of comparable effects on myometrial cells. *J Clin Endocrinol Metab* 92:616–623
- Friedman AJ, Daly M, Juneau-Norcross M, Rein MS, Fine C, Gleason R, Leboff M 1993 A prospective, randomized trial of gonadotropin-releasing hormone agonist plus estrogen-progestin or progestin ‘add-back’ regimens for women with leiomyomata uteri. *J Clin Endocrinol Metab* 76:1439–1445
- Fiscella K, Eisinger SH, Meldrum S, Feng C, Fisher SG, Guzik DS 2006 Effect of mifepristone for symptomatic leiomyomata on quality of life and uterine size: a randomized controlled trial. *Obstet Gynecol* 108:1381–1387
- Chwalisz K, DeManno D, Garg R, Larsen L, Mattia-Goldberg C, Stickler T 2004 Therapeutic potential for the selective progesterone receptor modulator asoprisnil in the treatment of leiomyomata. *Semin Reprod Med* 22:113–119
- Tsujimoto Y, Erikson J, Nowell PC, Croce CM 1986 Molecular genetics of human B cell neoplasia. *Symp Fundam Cancer Res* 38:79–93
- Korsmeyer SJ 1992 Bcl-2 initiates a new category of oncogenes: regulators of cell death. *Blood* 80:879–886
- Nunez G, London L, Hockenbery D, Alexander M, McKearn JP, Korsmeyer SJ 1990 Deregulated Bcl-2 gene expression selectively prolongs survival of growth factor-deprived hemopoietic cell lines. *J Immunol* 144:3602–3610
- Kandouz M, Siromachkova M, Jacob D, Chretien Marquet B, Therwath A, Gompel A 1996 Antagonism between estradiol and progestin on Bcl-2 expression in breast-cancer cells. *Int J Cancer* 68:120–125
- Gompel A, Sabourin JC, Martin A, Yaneva H, Audouin J, Decroix Y, Poitout P 1994 Bcl-2 expression in normal endometrium during the menstrual cycle. *Am J Pathol* 144:1195–1202
- Jeong JW, Lee KY, Kwak I, White LD, Hilsenbeck SG, Lydon JP, DeMayo FJ 2005 Identification of murine uterine genes regulated in a ligand-dependent manner by the progesterone receptor. *Endocrinology* 146:3490–3505
- Rossi MJ, Chegini N, Masterson BJ 1992 Presence of epidermal growth factor, platelet-derived growth factor, and their receptors in human myometrial tissue and smooth muscle cells: their action in smooth muscle cells *in vitro*. *Endocrinology* 130:1716–1727
- Deb S, Zhou J, Amin SA, Imir AG, Yilmaz MB, Lin Z, Bulun SE 2006 A novel role of sodium butyrate in the regulation of cancer-associated aromatase promoters I.3 and II by disrupting a transcriptional complex in breast adipose fibroblasts. *J Biol Chem* 281:2585–2597
- Kobayashi S, Lackey T, Huang Y, Bisping E, Pu WT, Boxer LM, Liang Q 2006 Transcription factor gata4 regulates cardiac BCL2 gene expression *in vitro* and *in vivo*. *FASEB J* 20:800–802
- Heckman CA, Mehew JW, Ying GG, Introna M, Golay J, Boxer LM 2000 A-Myb up-regulates Bcl-2 through a Cdx binding site in t(14;18) lymphoma cells. *J Biol Chem* 275:6499–6508
- Kastner P, Bocquel MT, Turcotte B, Garnier JM, Horwitz KB, Chambon P, Gronemeyer H 1990 Transient expression of human and chicken progesterone receptors does not support alternative translational initiation from a single mRNA as the mechanism generating two receptor isoforms. *J Biol Chem* 265:12163–12167
- Nawaz Z, Lonard DM, Smith CL, Lev-Lehman E, Tsai SY, Tsai MJ, O'Malley BW 1999 The Angelman syndrome-associated protein, E6-AP, is a coactivator for the nuclear hormone receptor superfamily. *Mol Cell Biol* 19:1182–1189
- Zaitseva M, Vollenhoven BJ, Rogers PA 2006 *In vitro* culture significantly alters gene expression profiles and reduces differences between myometrial and fibroid smooth muscle cells. *Mol Hum Reprod* 12:187–207
- Tang XM, Rossi MJ, Masterson BJ, Chegini N 1994 Insulin-like growth factor I (IGF-I), IGF-I receptors, and IGF binding proteins 1–4 in human uterine tissue: tissue localization and IGF-I action in endometrial stromal and myometrial smooth muscle cells *in vitro*. *Biol Reprod* 50:1113–1125
- Lieberman BA, Bona BJ, Edwards DP, Nordeen SK 1993 The constitution of a progesterone response element. *Mol Endocrinol* 7:515–527
- Shyamala G 1997 Roles of estrogen and progesterone in normal mammary gland development. Insights from progesterone receptor null mutant mice and *in situ* localization of receptor. *Trends Endocrinol Metab* 8:34–39
- Bulun S, Adashi E 2003 The physiology and pathology of the female reproductive axis. In: Larson PR, Kronenberg HM, Melmed S, Polonsky KS, eds. *Williams textbook of endocrinology*. Chap 16. Philadelphia: Elsevier Science USA; 587–664
- Kumar NS, Richer J, Owen G, Litman E, Horwitz KB, Leslie KK 1998 Selective down-regulation of progesterone receptor isoform B in poorly differ-

- entiated human endometrial cancer cells: implications for unopposed estrogen action. *Cancer Res* 58:1860–1865
33. **Mulac-Jericevic B, Mullinax RA, DeMayo FJ, Lydon JP, Conneely OM** 2000 Subgroup of reproductive functions of progesterone mediated by progesterone receptor-B isoform. *Science* 289:1751–1754
  34. **Conneely OM, Mulac-Jericevic B, DeMayo F, Lydon JP, O'Malley BW** 2002 Reproductive functions of progesterone receptors. *Recent Prog Horm Res* 57:339–355
  35. **Beato M, Herrlich P, Schutz G** 1995 Steroid hormone receptors: many actors in search of a plot. *Cell* 83:851–857
  36. **Beato M** 1989 Gene regulation by steroid hormones. *Cell* 56:335–344
  37. **Scheidereit C, Westphal HM, Carlson C, Bosshard H, Beato M** 1986 Molecular model of the interaction between the glucocorticoid receptor and the regulatory elements of inducible genes. *DNA* 5:383–391
  38. **Tsai SY, Carlstedt-Duke J, Weigel NL, Dahlman K, Gustafsson JA, Tsai MJ, O'Malley BW** 1988 Molecular interactions of steroid hormone receptor with its enhancer element: evidence for receptor dimer formation. *Cell* 55:361–369
  39. **Luisi BF, Xu WX, Otwinowski Z, Freedman LP, Yamamoto KR, Sigler PB** 1991 Crystallographic analysis of the interaction of the glucocorticoid receptor with DNA. *Nature* 352:497–505
  40. **Boonyaratanakornkit V, Scott MP, Ribon V, Sherman L, Anderson SM, Maller JL, Miller WT, Edwards DP** 2001 Progesterone receptor contains a proline-rich motif that directly interacts with SH3 domains and activates c-Src family tyrosine kinases. *Mol Cell* 8:269–280

JCEM is published monthly by The Endocrine Society (<http://www.endo-society.org>), the foremost professional society serving the endocrine community.
